# Supplementary material
Source: PubMed Central journal article supplement (PMC6499008)
Supplement: bhy031_rabin_supplemental_material.pdf [file bhy031_rabin_supplemental_material.pdf]

## **Supplementary Material**

Table 1. Summary of linear mixed models examining global and tract-specific MD on cognitive change (controlling for modified global MD)

Table 2. Summary of linear mixed models examining global and tract-specific RD on cognitive change (controlling for modified global RD)

Table 3. Summary of linear mixed models examining global and tract-specific AxD on cognitive change (controlling for modified global AxD)

Table 4. Summary of linear regression models examining global FA and tract-specific FA on baseline cognition (controlling for modified global FA)

Table 5. Summary of linear regression models examining global and tract-specific MD on baseline cognition (controlling for modified global MD)

Table 6. Summary of linear regression models examining global and tract-specific RD on baseline cognition (controlling for modified global RD)

Table 7. Summary of linear regression models examining global and tract-specific AxD on baseline cognition (controlling for modified global AxD)

Table 8. Summary of linear mixed models examining each modified measure of global FA on cognitive change

Table 9. Summary of linear mixed models examining tract-specific FA on cognitive change (not controlling for modified global FA)

## Methods

Confirmatory factor analyses of the neuropsychological measures were conducted on the Harvard Aging Brain baseline cohort. This includes 277 participants with at least one neuropsychological follow-up visit, without respect to the availability of diffusion-weighted imaging data. Neuropsychological data were available for 277 participants at baseline and first follow-up, 265 at second follow-up, 255 at third follow-up, 182 at fourth follow-up, 117 at fifth follow-up, and 36 at sixth follow-up. Initial separate models for the first three time-points had fit statistics as follows:  $\chi^2(17) = 13.4$ ,  $p = 0.71$ , TLI = 1.0, RMSEA = 0.0 at baseline;  $\chi^2(17) = 23.3$ ,  $p = 0.14$ , TLI = 0.978, RMSEA = 0.037 at first follow-up;  $\chi^2(17) = 24.6$ ,  $p = 0.71$ , TLI = 0.976, RMSEA = 0.041 at second follow-up. The average loadings of the first three time-points were computed and applied to all time-points to avoid biasing to a single time-point while enabling consistency of the measurement to be maintained even as new time-points are added. The loadings of each task on executive function were: .622 for phonemic fluency, .533 for Letter-Number Sequencing, and .666 for the Trail Making Test (Form B minus Form A). For episodic memory, the loadings were: .534 for Logical Memory, .605 for the Free and Cued Selective Reminding Test, and .739 for Six-Trial Selective Reminding. For processing speed, the loadings were: .942 for Digit Symbol Coding, and .637 for the Trail Making Test (Form A). Imposing these loadings on each time-point with available data from greater than 150 participants resulted in the following fit statistics:  $\chi^2(25) = 16.7$ ,  $p = 0.89$ , TLI = 1.0, RMSEA = 0.0 at baseline;  $\chi^2(25) = 25.2$ ,  $p = 0.45$ , TLI = 0.999, RMSEA = 0.006 at first follow-up;  $\chi^2(25) = 28.2$ ,  $p = 0.30$ , TLI = 0.993, RMSEA = 0.022 at second follow-up;  $\chi^2(25) = 43.7$ ,  $p = 0.01$ , TLI = 0.957, RMSEA = 0.054 at third follow-

up;  $\chi^2(25) = 25.9$ ,  $p = 0.41$ , TLI = 0.997, RMSEA = 0.014 at fourth follow-up.

Comparisons between the freely estimated models and the models with constrained loadings found no significant differences after correction for multiple comparisons. These findings suggest that application of the estimated loadings to all time-points provides acceptable model fit.

All neuropsychological tests were z-transformed using the mean and standard deviation from the baseline time-point ( $n = 277$ ) and scaled such that higher scores indicated better performance. The natural log of each timed measure from the Trail Making Test was computed prior to z-transformation.

In the present study, individual factor scores were removed from analyses if missing data caused the factor weight to be less than 50%. This resulted in exclusion of eight executive function scores, two episodic memory scores, and five processing speed scores across all time-points.

#### *MRI diffusion-weighted imaging*

In supplemental analyses, we examined additional diffusivity metrics including mean diffusivity (MD), radial diffusivity (RD), and axial diffusivity (AxD) using the same procedures as described for FA. These additional metrics describe the rate of diffusion; MD describes the average rate of diffusion along all 3 axes; RD describes the rate of diffusion perpendicular to the main axis (computed as the average of the 2 perpendicular axes), and AxD describes the rate of diffusion along the main axis of diffusion.

#### *Statistical analyses*

First, we examined the relationship between the diffusivity metrics and

longitudinal cognition using linear mixed models, as described in the main text. Next, we used linear regression models to address whether baseline global diffusion characteristics predicted baseline cognition independently (Model 1) or synergistically (Model 2) with amyloid status.

Model 1: Cognition ~ global + amyloid status + covariates

Model 2: Cognition ~ global x amyloid status + covariates

Cognition = executive function, episodic memory, or processing speed

Covariates = age at baseline, sex, years of education, and motion in the scanner

Time = time from baseline (years)

Note that Model 2 includes lower order effects

The second set of cross-sectional analyses examined whether the effects of diffusion characteristics on baseline cognition are tract-specific or global in nature. We examined both independent (Model 3) and synergistic effects (Model 4) of tract-specific white matter and amyloid status on cognition.

Model 3: Cognition ~ tract-specific + modified global + amyloid status + covariates

Model 4: Cognition ~ tract-specific x amyloid status + modified global x amyloid status + covariates

Cognition = executive function, episodic memory, or processing speed

Covariates = age at baseline, sex, years of education, and motion in the scanner

Time = time from baseline (years)

Note that Model 4 includes lower order effects

## Results

Results from the linear mixed models using MD, RD, and AxD are presented in Tables 1 – 3. Results from the linear regression models using FA, MD, RD, and AxD are presented in Tables 4 – 7.

Linear regression analyses on only the baseline data (Table 4) demonstrated a different pattern of results than did the longitudinal linear mixed models for global FA

presented in the main text. Here, we found that lower global FA predicted worse performance in executive function and processing speed but not in episodic memory. Removing amyloid status from these models did not alter the impact of global FA on cognition. In these cross-sectional models, amyloid status was not associated with any of the cognitive domains (all  $p > 0.128$ ) nor was the interaction of global FA with amyloid status (all  $p > 0.235$ ). A similar pattern of results was observed in the cross-sectional analyses that examined the other global diffusion measures (MD, RD, and AxD).

Table 1. Summary of linear mixed models examining global and tract-specific MD on cognitive change (controlling for modified global MD)

| Region                    | Estimate      | Std Error    | <i>t</i> -value | <i>p</i> value |
|---------------------------|---------------|--------------|-----------------|----------------|
| <b>Executive function</b> |               |              |                 |                |
| Global                    | 0.012         | 0.008        | 1.522           | 0.564          |
| ATR                       | -0.009        | 0.010        | -0.883          | 0.189          |
| CB                        | -0.008        | 0.012        | -0.674          | 0.250          |
| PHC                       | 0.012         | 0.008        | 1.526           | 0.564          |
| CST                       | 0.007         | 0.011        | 0.669           | 0.752          |
| Fma                       | 0.007         | 0.010        | 0.684           | 0.747          |
| Fmi                       | -0.001        | 0.011        | -0.092          | 0.464          |
| IFOF                      | -0.014        | 0.019        | -0.774          | 0.220          |
| ILF                       | 0.009         | 0.011        | 0.884           | 0.689          |
| SLF                       | 0.031         | 0.012        | 2.487           | 0.507          |
| <b>Episodic memory</b>    |               |              |                 |                |
| Global                    | -0.021        | 0.012        | -1.786          | 0.037          |
| ATR                       | -0.020        | 0.014        | -1.389          | 0.083          |
| CB                        | -0.008        | 0.018        | -0.445          | 0.328          |
| PHC                       | 0.014         | 0.012        | 1.220           | 0.611          |
| CST                       | 0.010         | 0.015        | 0.627           | 0.765          |
| Fma                       | 0.011         | 0.014        | 0.741           | 0.730          |
| Fmi                       | 0.008         | 0.016        | 0.485           | 0.814          |
| IFOF                      | 0.006         | 0.027        | 0.227           | 0.910          |
| ILF                       | -0.013        | 0.016        | -0.841          | 0.200          |
| SLF                       | 0.001         | 0.018        | 0.047           | 0.981          |
| <b>Processing speed</b>   |               |              |                 |                |
| Global                    | -0.020        | 0.009        | -2.068          | 0.019          |
| ATR                       | <b>-0.031</b> | <b>0.012</b> | <b>-2.695</b>   | <b>0.004</b>   |
| CB                        | 0.016         | 0.014        | 1.160           | 0.623          |
| PHC                       | 0.006         | 0.009        | 0.631           | 0.764          |
| CST                       | -0.002        | 0.012        | -0.177          | 0.430          |
| Fma                       | 0.004         | 0.012        | 0.332           | 0.870          |
| Fmi                       | 0.002         | 0.013        | 0.164           | 0.935          |
| IFOF                      | -0.026        | 0.021        | -1.224          | 0.110          |
| ILF                       | -0.003        | 0.012        | -0.249          | 0.402          |
| SLF                       | 0.021         | 0.014        | 1.513           | 0.565          |

Each row summarizes the results from a separate linear mixed model. All models control for age, sex, education, motion in the scanner, amyloid status, and their interactions with time. In tract-specific analyses, the modified measure of global MD in each model does not include the specific tract under investigation. Abbreviations: MD = mean diffusivity; ATR = anterior thalamic radiation; CB = cingulum bundle; PHC = parahippocampal cingulum; CST = corticospinal tract; IFOF = inferior frontal occipital fasciculus; ILF = inferior longitudinal fasciculus; Fma = forceps major; Fmi = forceps minor; SLF = superior longitudinal fasciculus. Bolded values are significant at  $p < 0.017$  for global effects and  $p < 0.006$  for tract-specific effects.

Table 2. Summary of linear mixed models examining global and tract-specific RD on cognitive change (controlling for modified global RD)

| Region                    | Estimate      | Std Error    | <i>t</i> -value | <i>p</i> value |
|---------------------------|---------------|--------------|-----------------|----------------|
| <b>Executive function</b> |               |              |                 |                |
| Global                    | 0.005         | 0.008        | 0.621           | 0.767          |
| ATR                       | -0.010        | 0.010        | -0.953          | 0.171          |
| CB                        | -0.024        | 0.012        | -1.948          | 0.026          |
| PHC                       | 0.008         | 0.009        | 0.954           | 0.670          |
| CST                       | 0.004         | 0.011        | 0.320           | 0.875          |
| Fma                       | -0.002        | 0.011        | -0.143          | 0.443          |
| Fmi                       | -0.002        | 0.012        | -0.130          | 0.448          |
| IFOF                      | -0.011        | 0.018        | -0.587          | 0.279          |
| ILF                       | 0.017         | 0.011        | 1.554           | 0.560          |
| SLF                       | 0.021         | 0.013        | 1.575           | 0.558          |
| <b>Episodic memory</b>    |               |              |                 |                |
| Global                    | <b>-0.030</b> | <b>0.012</b> | <b>-2.552</b>   | <b>0.005</b>   |
| ATR                       | -0.016        | 0.015        | -1.087          | 0.139          |
| CB                        | -0.027        | 0.018        | -1.517          | 0.065          |
| PHC                       | 0.006         | 0.012        | 0.492           | 0.812          |
| CST                       | 0.007         | 0.016        | 0.468           | 0.820          |
| Fma                       | 0.001         | 0.016        | 0.085           | 0.967          |
| Fmi                       | -0.003        | 0.017        | -0.204          | 0.420          |
| IFOF                      | 0.020         | 0.026        | 0.798           | 0.713          |
| ILF                       | -0.007        | 0.016        | -0.442          | 0.329          |
| SLF                       | -0.006        | 0.019        | -0.332          | 0.370          |
| <b>Processing speed</b>   |               |              |                 |                |
| Global                    | <b>-0.023</b> | <b>0.009</b> | <b>-2.490</b>   | <b>0.006</b>   |
| ATR                       | -0.028        | 0.012        | -2.407          | 0.008          |
| CB                        | 0.004         | 0.014        | 0.271           | 0.894          |
| PHC                       | 0.002         | 0.010        | 0.170           | 0.933          |
| CST                       | 0.007         | 0.013        | 0.538           | 0.796          |
| Fma                       | -0.010        | 0.013        | -0.819          | 0.207          |
| Fmi                       | -0.002        | 0.014        | -0.146          | 0.442          |
| IFOF                      | -0.035        | 0.021        | -1.678          | 0.047          |
| ILF                       | -0.004        | 0.013        | -0.328          | 0.372          |
| SLF                       | 0.027         | 0.015        | 1.814           | 0.535          |

Each row summarizes the results from a separate linear mixed model. All models control for age, sex, education, motion in the scanner, amyloid status, and their interactions with time. In tract-specific analyses, the modified measure of global RD does not include the specific tract under investigation. Abbreviations: RD = radial diffusivity; ATR = anterior thalamic radiation; CB = cingulum bundle; PHC = parahippocampal cingulum; CST = corticospinal tract; IFOF = inferior frontal occipital fasciculus; ILF = inferior longitudinal fasciculus; Fma = forceps major; Fmi = forceps minor; SLF = superior longitudinal fasciculus. Bolded values are significant at  $p < 0.017$  for global effects and  $p < 0.006$  for tract-specific effects.

Table 3. Summary of linear mixed models examining global and tract-specific AxD on cognitive change (controlling for modified global AxD)

| Region                    | Estimate      | Std Error    | <i>t</i> -value | <i>p</i> value |
|---------------------------|---------------|--------------|-----------------|----------------|
| <b>Executive function</b> |               |              |                 |                |
| Global                    | 0.027         | 0.008        | 3.413           | 0.500          |
| ATR                       | -0.003        | 0.009        | -0.269          | 0.394          |
| CB                        | 0.009         | 0.009        | 1.032           | 0.652          |
| PHC                       | 0.012         | 0.008        | 1.652           | 0.550          |
| CST                       | 0.010         | 0.008        | 1.191           | 0.617          |
| Fma                       | 0.011         | 0.008        | 1.363           | 0.587          |
| Fmi                       | 0.001         | 0.009        | 0.173           | 0.932          |
| IFOF                      | -0.004        | 0.013        | -0.352          | 0.363          |
| ILF                       | -0.001        | 0.009        | -0.160          | 0.437          |
| SLF                       | 0.030         | 0.009        | 3.320           | 0.500          |
| <b>Episodic memory</b>    |               |              |                 |                |
| Global                    | 0.005         | 0.011        | 0.398           | 0.845          |
| ATR                       | -0.021        | 0.014        | -1.542          | 0.062          |
| CB                        | 0.015         | 0.013        | 1.153           | 0.625          |
| PHC                       | 0.020         | 0.011        | 1.778           | 0.538          |
| CST                       | 0.008         | 0.012        | 0.651           | 0.758          |
| Fma                       | 0.016         | 0.011        | 1.421           | 0.578          |
| Fmi                       | 0.019         | 0.013        | 1.468           | 0.571          |
| IFOF                      | -0.015        | 0.019        | -0.813          | 0.208          |
| ILF                       | -0.018        | 0.013        | -1.371          | 0.086          |
| SLF                       | 0.008         | 0.013        | 0.647           | 0.759          |
| <b>Processing speed</b>   |               |              |                 |                |
| Global                    | -0.006        | 0.009        | -0.664          | 0.253          |
| ATR                       | <b>-0.030</b> | <b>0.011</b> | <b>-2.650</b>   | <b>0.004</b>   |
| CB                        | 0.017         | 0.011        | 1.603           | 0.555          |
| PHC                       | 0.009         | 0.009        | 1.041           | 0.649          |
| CST                       | -0.009        | 0.010        | -0.943          | 0.173          |
| Fma                       | 0.016         | 0.009        | 1.696           | 0.545          |
| Fmi                       | 0.007         | 0.010        | 0.669           | 0.752          |
| IFOF                      | 0.000         | 0.015        | 0.010           | 0.996          |
| ILF                       | -0.002        | 0.011        | -0.215          | 0.415          |
| SLF                       | 0.006         | 0.010        | 0.557           | 0.789          |

Each row summarizes the results from a separate linear mixed model. All models control for age, sex, education, motion in the scanner, amyloid status, and their interactions with time. In tract-specific analyses, the modified measure of global AxD does not include the specific tract under investigation. Abbreviations: AxD = axial diffusivity; ATR = anterior thalamic radiation; CB = cingulum bundle; PHC = parahippocampal cingulum; CST = corticospinal tract; IFOF = inferior frontal occipital fasciculus; ILF = inferior longitudinal fasciculus; Fma = forceps major; Fmi = forceps minor; SLF = superior longitudinal fasciculus. Bolded values are significant at  $p < 0.017$  for global effects and  $p < 0.006$  for tract-specific effects.



Table 4. Summary of linear regression models examining global FA and tract-specific FA on baseline cognition (controlling for modified global FA)

| Region                    | Estimate     | Std Error    | <i>t</i> -value | <i>p</i> value |
|---------------------------|--------------|--------------|-----------------|----------------|
| <b>Executive function</b> |              |              |                 |                |
| Global                    | <b>0.116</b> | <b>0.048</b> | <b>2.414</b>    | <b>0.008</b>   |
| ATR                       | -0.038       | 0.062        | -0.621          | 0.768          |
| CB                        | -0.082       | 0.068        | -1.214          | 0.613          |
| PHC                       | 0.015        | 0.053        | 0.286           | 0.388          |
| CST                       | 0.020        | 0.061        | 0.337           | 0.369          |
| Fma                       | -0.040       | 0.061        | -0.654          | 0.757          |
| Fmi                       | 0.143        | 0.070        | 2.061           | 0.020          |
| IFOF                      | -0.093       | 0.091        | -1.026          | 0.652          |
| ILF                       | 0.083        | 0.069        | 1.210           | 0.114          |
| SLF                       | 0.011        | 0.082        | 0.130           | 0.448          |
| <b>Episodic memory</b>    |              |              |                 |                |
| Global                    | -0.041       | 0.048        | -0.849          | 0.698          |
| ATR                       | -0.031       | 0.063        | -0.498          | 0.810          |
| CB                        | 0.097        | 0.068        | 1.413           | 0.080          |
| PHC                       | -0.007       | 0.054        | -0.131          | 0.948          |
| CST                       | -0.073       | 0.061        | -1.194          | 0.617          |
| Fma                       | -0.066       | 0.062        | -1.066          | 0.644          |
| Fmi                       | 0.113        | 0.070        | 1.620           | 0.054          |
| IFOF                      | 0.055        | 0.091        | 0.602           | 0.274          |
| ILF                       | -0.005       | 0.070        | -0.067          | 0.973          |
| SLF                       | -0.080       | 0.082        | -0.970          | 0.667          |
| <b>Processing speed</b>   |              |              |                 |                |
| Global                    | <b>0.128</b> | <b>0.055</b> | <b>2.351</b>    | <b>0.010</b>   |
| ATR                       | -0.131       | 0.070        | -1.858          | 0.532          |
| CB                        | 0.120        | 0.077        | 1.561           | 0.060          |
| PHC                       | 0.024        | 0.061        | 0.402           | 0.344          |
| CST                       | -0.064       | 0.069        | -0.933          | 0.676          |
| Fma                       | 0.040        | 0.070        | 0.572           | 0.284          |
| Fmi                       | 0.125        | 0.079        | 1.582           | 0.058          |
| IFOF                      | -0.105       | 0.103        | -1.015          | 0.656          |
| ILF                       | 0.188        | 0.078        | 2.417           | 0.008          |
| SLF                       | 0.029        | 0.092        | 0.317           | 0.376          |

Each row summarizes the results from a separate linear regression model. All models control for age, sex, education, motion in the scanner, and amyloid status. In tract-specific analyses, the modified measure of global FA does not include the specific tract under investigation. Abbreviations: FA = fractional anisotropy; ATR = anterior thalamic radiation; CB = cingulum bundle; PHC = parahippocampal cingulum; CST = corticospinal tract; IFOF = inferior frontal occipital fasciculus; ILF = inferior longitudinal fasciculus; Fma = forceps major; Fmi = forceps minor; SLF = superior longitudinal fasciculus. Bolded values are significant at  $p < 0.017$  for global effects and  $p < 0.006$  for tract-specific effects.

Table 5. Summary of linear regression models examining global and tract-specific MD on baseline cognition (controlling for modified global MD)

| Region                    | Estimate      | Std Error    | <i>t</i> -value | <i>p</i> value |
|---------------------------|---------------|--------------|-----------------|----------------|
| <b>Executive function</b> |               |              |                 |                |
| Global                    | <b>-0.135</b> | <b>0.048</b> | <b>-2.811</b>   | <b>0.003</b>   |
| ATR                       | -0.010        | 0.062        | -0.157          | 0.438          |
| CB                        | 0.019         | 0.073        | 0.259           | 0.898          |
| PHC                       | 0.018         | 0.050        | 0.365           | 0.858          |
| CST                       | 0.028         | 0.066        | 0.423           | 0.837          |
| Fma                       | 0.039         | 0.061        | 0.639           | 0.762          |
| Fmi                       | -0.125        | 0.067        | -1.866          | 0.032          |
| IFOF                      | 0.083         | 0.112        | 0.741           | 0.730          |
| ILF                       | -0.110        | 0.066        | -1.682          | 0.047          |
| SLF                       | -0.040        | 0.075        | -0.534          | 0.297          |
| <b>Episodic memory</b>    |               |              |                 |                |
| Global                    | 0.017         | 0.049        | 0.354           | 0.862          |
| ATR                       | 0.025         | 0.062        | 0.401           | 0.845          |
| CB                        | -0.035        | 0.074        | -0.481          | 0.312          |
| PHC                       | 0.037         | 0.050        | 0.738           | 0.731          |
| CST                       | 0.085         | 0.067        | 1.273           | 0.601          |
| Fma                       | -0.011        | 0.062        | -0.172          | 0.432          |
| Fmi                       | -0.150        | 0.067        | -2.235          | 0.013          |
| IFOF                      | -0.028        | 0.113        | -0.248          | 0.402          |
| ILF                       | -0.021        | 0.067        | -0.309          | 0.379          |
| SLF                       | 0.068         | 0.075        | 0.897           | 0.686          |
| <b>Processing speed</b>   |               |              |                 |                |
| Global                    | <b>-0.125</b> | <b>0.055</b> | <b>-2.280</b>   | <b>0.012</b>   |
| ATR                       | 0.099         | 0.070        | 1.417           | 0.579          |
| CB                        | 0.098         | 0.083        | 1.180           | 0.620          |
| PHC                       | 0.044         | 0.056        | 0.785           | 0.717          |
| CST                       | 0.065         | 0.075        | 0.870           | 0.692          |
| Fma                       | -0.066        | 0.070        | -0.944          | 0.173          |
| Fmi                       | -0.149        | 0.077        | -1.945          | 0.027          |
| IFOF                      | 0.162         | 0.127        | 1.280           | 0.601          |
| ILF                       | -0.126        | 0.075        | -1.689          | 0.046          |
| SLF                       | -0.067        | 0.085        | -0.784          | 0.217          |

Each row summarizes the results from a separate linear regression model. All models control for age, sex, education, motion in the scanner, and amyloid status at baseline. In tract-specific analyses, the modified measure of global MD does not include the specific tract under investigation. Abbreviations: MD = mean diffusivity; ATR = anterior thalamic radiation; CB = cingulum bundle; PHC = parahippocampal cingulum; CST = corticospinal tract; IFOF = inferior frontal occipital fasciculus; ILF = inferior longitudinal fasciculus; Fma = forceps major; Fmi = forceps minor; SLF = superior longitudinal fasciculus. Bolded values are significant at  $p < 0.017$  for global effects and  $p < 0.006$  for tract-specific effects.

Table 6. Summary of linear regression models examining global and tract-specific RD on baseline cognition (controlling for modified global RD)

| Region                    | Estimate      | Std Error    | <i>t</i> -value | <i>p</i> value |
|---------------------------|---------------|--------------|-----------------|----------------|
| <b>Executive function</b> |               |              |                 |                |
| Global                    | <b>-0.130</b> | <b>0.048</b> | <b>-2.704</b>   | <b>0.004</b>   |
| ATR                       | 0.002         | 0.063        | 0.033           | 0.987          |
| CB                        | 0.063         | 0.075        | 0.850           | 0.698          |
| PHC                       | -0.009        | 0.052        | -0.174          | 0.431          |
| CST                       | 0.016         | 0.066        | 0.245           | 0.903          |
| Fma                       | 0.052         | 0.065        | 0.807           | 0.710          |
| Fmi                       | -0.159        | 0.071        | -2.222          | 0.014          |
| IFOF                      | 0.103         | 0.110        | 0.942           | 0.674          |
| ILF                       | -0.108        | 0.070        | -1.558          | 0.061          |
| SLF                       | -0.015        | 0.080        | -0.190          | 0.425          |
| <b>Episodic memory</b>    |               |              |                 |                |
| Global                    | 0.029         | 0.049        | 0.603           | 0.774          |
| ATR                       | 0.035         | 0.064        | 0.549           | 0.792          |
| CB                        | -0.078        | 0.076        | -1.029          | 0.152          |
| PHC                       | 0.017         | 0.053        | 0.326           | 0.872          |
| CST                       | 0.093         | 0.067        | 1.397           | 0.582          |
| Fma                       | 0.044         | 0.065        | 0.667           | 0.753          |
| Fmi                       | -0.167        | 0.072        | -2.320          | 0.011          |
| IFOF                      | -0.065        | 0.111        | -0.582          | 0.281          |
| ILF                       | -0.021        | 0.071        | -0.293          | 0.385          |
| SLF                       | 0.097         | 0.813        | 1.192           | 0.617          |
| <b>Processing speed</b>   |               |              |                 |                |
| Global                    | <b>-0.136</b> | <b>0.055</b> | <b>-2.479</b>   | <b>0.007</b>   |
| ATR                       | 0.117         | 0.072        | 1.637           | 0.552          |
| CB                        | -0.060        | 0.085        | -0.702          | 0.242          |
| PHC                       | 0.014         | 0.059        | 0.230           | 0.909          |
| CST                       | 0.081         | 0.075        | 1.080           | 0.641          |
| Fma                       | -0.059        | 0.074        | -0.806          | 0.211          |
| Fmi                       | -0.164        | 0.081        | -2.011          | 0.023          |
| IFOF                      | 0.175         | 0.124        | 1.408           | 0.580          |
| ILF                       | -0.160        | 0.079        | -2.023          | 0.022          |
| SLF                       | -0.064        | 0.092        | -0.704          | 0.241          |

Each row summarizes the results from a separate linear regression model. All models control for age, sex, education, motion in the scanner, and amyloid status. In tract-specific analyses, the modified measure of global RD does not include the specific tract under investigation. Abbreviations: RD = radial diffusivity; ATR = anterior thalamic radiation; CB = cingulum bundle; PHC = parahippocampal cingulum; CST = corticospinal tract; IFOF = inferior frontal occipital fasciculus; ILF = inferior longitudinal fasciculus; Fma = forceps major; Fmi = forceps minor; SLF = superior longitudinal fasciculus. Bolded values are significant at  $p < 0.017$  for global effects and  $p < 0.006$  for tract-specific effects.

Table 7. Summary of linear regression models examining global and tract-specific AxD on baseline cognition (controlling for modified global AxD)

| Region                    | Estimate      | Std Error    | <i>t</i> -value | <i>p</i> value |
|---------------------------|---------------|--------------|-----------------|----------------|
| <b>Executive function</b> |               |              |                 |                |
| Global                    | <b>-0.116</b> | <b>0.047</b> | <b>-2.464</b>   | <b>0.007</b>   |
| ATR                       | -0.032        | 0.059        | -0.536          | 0.296          |
| CB                        | -0.019        | 0.052        | -0.354          | 0.362          |
| PHC                       | 0.050         | 0.047        | 1.072           | 0.643          |
| CST                       | 0.009         | 0.050        | 0.175           | 0.931          |
| Fma                       | 0.009         | 0.049        | 0.186           | 0.927          |
| Fmi                       | -0.047        | 0.055        | -0.867          | 0.194          |
| IFOF                      | -0.029        | 0.079        | -0.362          | 0.359          |
| ILF                       | -0.097        | 0.055        | -1.750          | 0.041          |
| SLF                       | -0.049        | 0.054        | -0.904          | 0.184          |
| <b>Episodic memory</b>    |               |              |                 |                |
| Global                    | -0.011        | 0.048        | -0.225          | 0.411          |
| ATR                       | 0.006         | 0.060        | 0.108           | 0.957          |
| CB                        | 0.021         | 0.053        | 0.404           | 0.843          |
| PHC                       | 0.054         | 0.048        | 1.132           | 0.629          |
| CST                       | 0.018         | 0.051        | 0.362           | 0.859          |
| Fma                       | -0.055        | 0.049        | -1.119          | 0.132          |
| Fmi                       | -0.083        | 0.055        | -1.520          | 0.065          |
| IFOF                      | 0.030         | 0.080        | 0.381           | 0.852          |
| ILF                       | -0.011        | 0.056        | -0.194          | 0.423          |
| SLF                       | 0.008         | 0.055        | 0.145           | 0.943          |
| <b>Processing speed</b>   |               |              |                 |                |
| Global                    | -0.071        | 0.054        | -1.322          | 0.094          |
| ATR                       | 0.051         | 0.676        | 0.756           | 0.725          |
| CB                        | 0.167         | 0.059        | 2.845           | 0.502          |
| PHC                       | 0.073         | 0.054        | 1.353           | 0.589          |
| CST                       | 0.001         | 0.057        | 0.022           | 0.991          |
| Fma                       | -0.019        | 0.056        | -0.342          | 0.367          |
| Fmi                       | -0.088        | 0.063        | -1.409          | 0.080          |
| IFOF                      | 0.028         | 0.091        | 0.308           | 0.880          |
| ILF                       | -0.067        | 0.062        | -1.059          | 0.146          |
| SLF                       | -0.040        | 0.062        | -0.653          | 0.257          |

Each row summarizes the results from a separate linear regression model. All models control for age, sex, education, motion in the scanner, and amyloid status. In tract-specific analyses, the modified measure of global AxD does not include the specific tract under investigation. Abbreviations: AxD = axial diffusivity; ATR = anterior thalamic radiation; CB = cingulum bundle; PHC = parahippocampal cingulum; CST = corticospinal tract; IFOF = inferior frontal occipital fasciculus; ILF = inferior longitudinal fasciculus; Fma = forceps major; Fmi = forceps minor; SLF = superior longitudinal fasciculus. Bolded values are significant at  $p < 0.017$  for global effects and  $p < 0.006$  for tract-specific effects.

Table 8. Summary of linear mixed models examining each modified measure of global FA on cognitive change

|                           | Estimate     | Std Error    | <i>t</i> -value | <i>p</i> value |
|---------------------------|--------------|--------------|-----------------|----------------|
| <b>Executive function</b> |              |              |                 |                |
| All tracts except ATR     | 0.000        | 0.008        | -0.054          | 0.979          |
| All tracts except CB      | 0.000        | 0.008        | -0.045          | 0.982          |
| All tracts except PHC     | 0.000        | 0.008        | 0.090           | 0.464          |
| All tracts except CST     | 0.000        | 0.008        | 0.061           | 0.476          |
| All tracts except Fma     | 0.000        | 0.008        | 0.004           | 0.499          |
| All tracts except Fmi     | 0.000        | 0.008        | -0.041          | 0.984          |
| All tracts except IFOF    | 0.000        | 0.008        | -0.031          | 0.988          |
| All tracts except ILF     | 0.002        | 0.008        | 0.209           | 0.417          |
| All tracts except SLF     | 0.001        | 0.008        | 0.181           | 0.428          |
| <b>Episodic memory</b>    |              |              |                 |                |
| All tracts except ATR     | <b>0.032</b> | <b>0.011</b> | <b>2.805</b>    | <b>0.003</b>   |
| All tracts except CB      | <b>0.032</b> | <b>0.011</b> | <b>2.810</b>    | <b>0.003</b>   |
| All tracts except PHC     | <b>0.033</b> | <b>0.011</b> | <b>2.912</b>    | <b>0.002</b>   |
| All tracts except CST     | <b>0.033</b> | <b>0.011</b> | <b>2.918</b>    | <b>0.002</b>   |
| All tracts except Fma     | <b>0.032</b> | <b>0.011</b> | <b>2.849</b>    | <b>0.003</b>   |
| All tracts except Fmi     | <b>0.030</b> | <b>0.011</b> | <b>2.696</b>    | <b>0.004</b>   |
| All tracts except IFOF    | <b>0.033</b> | <b>0.011</b> | <b>2.937</b>    | <b>0.002</b>   |
| All tracts except ILF     | <b>0.033</b> | <b>0.011</b> | <b>2.908</b>    | <b>0.002</b>   |
| All tracts except SLF     | <b>0.033</b> | <b>0.012</b> | <b>2.650</b>    | <b>0.004</b>   |
| <b>Processing speed</b>   |              |              |                 |                |
| All tracts except ATR     | <b>0.021</b> | <b>0.009</b> | <b>2.266</b>    | <b>0.012</b>   |
| All tracts except CB      | <b>0.022</b> | <b>0.009</b> | <b>2.429</b>    | <b>0.008</b>   |
| All tracts except PHC     | <b>0.023</b> | <b>0.009</b> | <b>2.480</b>    | <b>0.007</b>   |
| All tracts except CST     | <b>0.023</b> | <b>0.009</b> | <b>2.554</b>    | <b>0.006</b>   |
| All tracts except Fma     | <b>0.022</b> | <b>0.009</b> | <b>2.366</b>    | <b>0.009</b>   |
| All tracts except Fmi     | <b>0.021</b> | <b>0.009</b> | <b>2.343</b>    | <b>0.010</b>   |
| All tracts except IFOF    | <b>0.021</b> | <b>0.009</b> | <b>2.240</b>    | <b>0.013</b>   |
| All tracts except ILF     | <b>0.022</b> | <b>0.009</b> | <b>2.424</b>    | <b>0.008</b>   |
| All tracts except SLF     | <b>0.026</b> | <b>0.009</b> | <b>2.845</b>    | <b>0.003</b>   |

Each row summarizes the results from a separate linear mixed model that examines the contribution of each modified measure of global FA to longitudinal cognitive change. All models control for age, sex, education, motion in the scanner, amyloid status, and their interactions with time. Abbreviations: FA = fractional anisotropy; ATR = anterior thalamic radiation; CB = cingulum bundle; PHC = parahippocampal cingulum; CST = corticospinal tract; IFOF = inferior frontal occipital fasciculus; ILF = inferior longitudinal fasciculus; Fma = forceps major; Fmi = forceps minor; SLF = superior longitudinal fasciculus. Bolded values are significant at  $p < 0.017$ .

Table 9. Summary of linear mixed models examining tract-specific FA on cognitive change (not controlling for modified global FA)

|                           | Estimate     | Std Error    | <i>t</i> -value | <i>p</i> value |
|---------------------------|--------------|--------------|-----------------|----------------|
| <b>Executive function</b> |              |              |                 |                |
| ATR                       | 0.005        | 0.007        | 0.689           | 0.246          |
| CB                        | 0.014        | 0.008        | 1.659           | 0.049          |
| PHC                       | -0.005       | 0.008        | -0.636          | 0.762          |
| CST                       | -0.001       | 0.008        | -0.159          | 0.937          |
| Fma                       | 0.003        | 0.008        | 0.384           | 0.351          |
| Fmi                       | 0.003        | 0.008        | 0.360           | 0.360          |
| IFOF                      | 0.003        | 0.008        | 0.424           | 0.336          |
| ILF                       | -0.010       | 0.008        | -1.286          | 0.599          |
| SLF                       | -0.003       | 0.008        | -0.367          | 0.858          |
| <b>Episodic memory</b>    |              |              |                 |                |
| ATR                       | 0.025        | 0.011        | 2.324           | 0.010          |
| CB                        | <b>0.036</b> | <b>0.012</b> | <b>3.056</b>    | <b>0.001</b>   |
| PHC                       | 0.008        | 0.011        | 0.688           | 0.246          |
| CST                       | 0.017        | 0.011        | 1.535           | 0.063          |
| Fma                       | 0.025        | 0.012        | 2.073           | 0.020          |
| Fmi                       | <b>0.033</b> | <b>0.011</b> | <b>2.901</b>    | <b>0.002</b>   |
| IFOF                      | 0.024        | 0.011        | 2.161           | 0.016          |
| ILF                       | 0.020        | 0.011        | 1.835           | 0.034          |
| SLF                       | <b>0.029</b> | <b>0.011</b> | <b>2.661</b>    | <b>0.004</b>   |
| <b>Processing speed</b>   |              |              |                 |                |
| ATR                       | <b>0.025</b> | <b>0.009</b> | <b>2.876</b>    | <b>0.002</b>   |
| CB                        | 0.019        | 0.010        | 2.028           | 0.022          |
| PHC                       | 0.005        | 0.009        | 0.565           | 0.286          |
| CST                       | 0.008        | 0.009        | 0.932           | 0.176          |
| Fma                       | 0.023        | 0.010        | 2.419           | 0.008          |
| Fmi                       | 0.022        | 0.009        | 2.313           | 0.011          |
| IFOF                      | <b>0.027</b> | <b>0.009</b> | <b>3.026</b>    | <b>0.001</b>   |
| ILF                       | 0.017        | 0.009        | 1.969           | 0.025          |
| SLF                       | 0.009        | 0.009        | 1.005           | 0.158          |

Each row summarizes the results from a separate linear mixed model that examines the contribution of each tract to longitudinal cognitive change, not controlling for global FA. All models control for age, sex, education, motion in the scanner, amyloid status, and their interactions with time. Abbreviations: FA = fractional anisotropy; ATR = anterior thalamic radiation; CB = cingulum bundle; PHC = parahippocampal cingulum; CST = corticospinal tract; IFOF = inferior frontal occipital fasciculus; ILF = inferior longitudinal fasciculus; Fma = forceps major; Fmi = forceps minor; SLF = superior longitudinal fasciculus. Bolded values are significant at  $p < 0.006$  for tract-specific effects.
